# Supplementary material for: Comparative and evolutionary analyses reveal conservation and divergence of the notch pathway in lophotrochozoa
Source: PubMed Central journal article supplement (PMC8166818; doi:10.1038/s41598-021-90800-8), 2021-05-31

a

Tree scale: 1

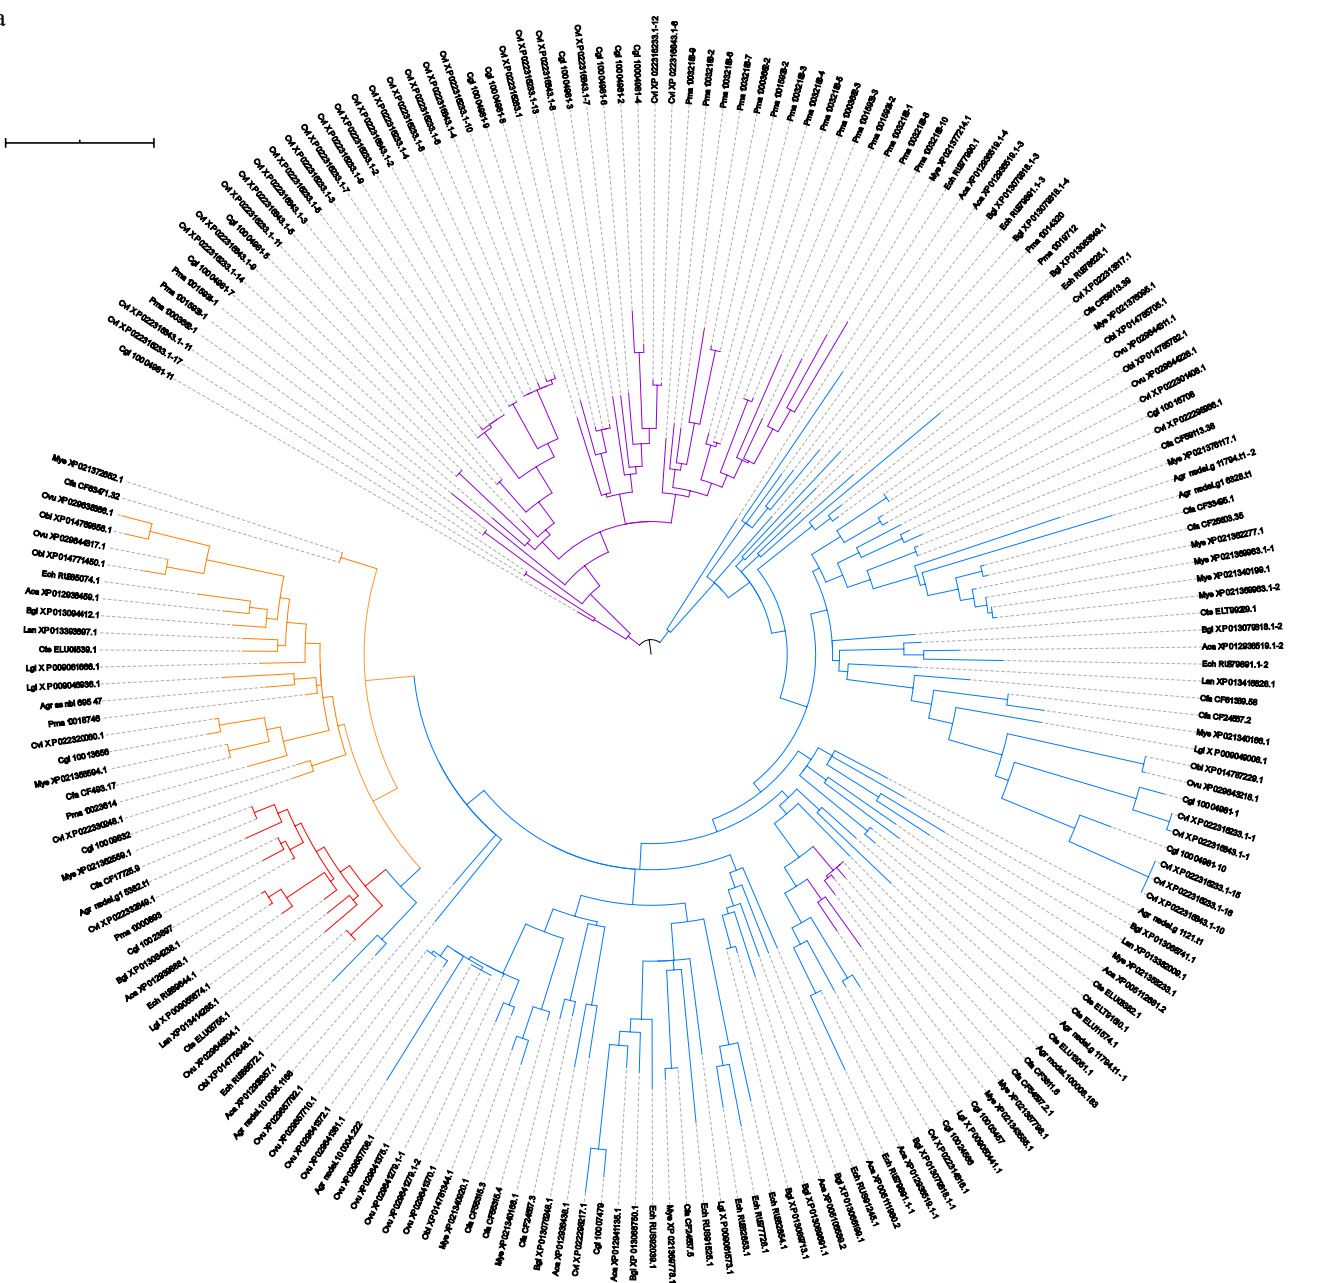

b

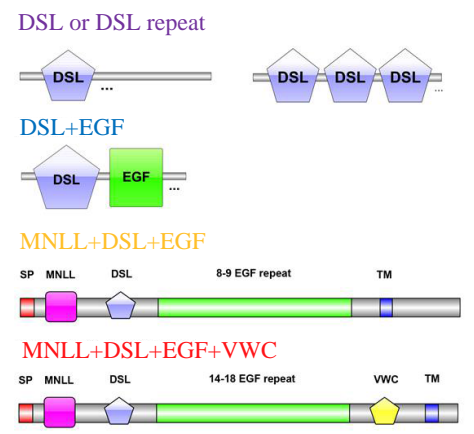

Supplement: 41598_2021_90800_MOESM7_ESM.pdf [file 41598_2021_90800_MOESM7_ESM.pdf]
