# Supplementary material for: Comparative and evolutionary analyses reveal conservation and divergence of the notch pathway in lophotrochozoa
Source: PubMed Central journal article supplement (PMC8166818; doi:10.1038/s41598-021-90800-8), 2021-05-31
Supplement: 41598_2021_90800_MOESM8_ESM.pdf [file 41598_2021_90800_MOESM8_ESM.pdf]

**Comparative and Evolutionary Analyses Reveals the Conservation and Divergence of the Notch Pathway in the Lophotrochozoa**

**Xin He<sup>a,b,c,f</sup>, Fucun Wu<sup>a,b,e,f,\*</sup>, Linlin Zhang<sup>a,b,e,\*</sup>, Li Li<sup>a,d,e</sup>, Guofan Zhang<sup>a,b,e</sup>**

<sup>a</sup> CAS and Shandong Province Key Laboratory of Experimental Marine Biology, Center for Ocean Mega-Science, Institute of Oceanology, Chinese Academy of Sciences, Qingdao, 266071, China

<sup>b</sup> Laboratory for Marine Biology and Biotechnology, Pilot National Laboratory for Marine Science and Technology, Qingdao 266237, China

<sup>c</sup> University of Chinese Academy of Sciences, Beijing 100039, China

<sup>d</sup> Laboratory for Marine Fisheries Science and Food Production Processes, Pilot National Laboratory for Marine Science and Technology, Qingdao 266237, China

<sup>e</sup> National and Local Joint Engineering Laboratory of Ecological Mariculture, Qingdao 266071, China

<sup>f</sup> The Innovation of Seed Design, Chinese Academy of Sciences, Wuhan 430072, China

\* Corresponding author.

E-mail address: [wufucun@qdio.ac.cn](mailto:wufucun@qdio.ac.cn) (FW), [linlinzhang@qdio.ac.cn](mailto:linlinzhang@qdio.ac.cn) (LZ)

**Table S1** Pfam Accession

|        |                 |                  |                   |                  |                   |                      |                      |                     |
|--------|-----------------|------------------|-------------------|------------------|-------------------|----------------------|----------------------|---------------------|
| Domain | <b>Notch</b>    | <b>DSL</b>       | <b>EGF</b>        | <b>VWC</b>       | <b>Presenilin</b> | <b>BTD</b>           | <b>LAG1-DNAbind</b>  | <b>HLH</b>          |
| Pfam   | PF00066         | PF01414          | PF00008           | PF00093          | PF01080.          | PF09270.             | PF09271              | PF00010             |
| Domain | <b>FGF</b>      | <b>HH_signal</b> | <b>Insulin</b>    | <b>MH2</b>       | <b>Frizzled</b>   | <b>Wnt</b>           | <b>Activin_recip</b> | <b>TALPID3</b>      |
| Pfam   | PF00167         | PF01085          | PF00049           | PF03166          | PF01534           | PF00110              | PF01064              | PF15324             |
| Domain | <b>Homeobox</b> | <b>Forkhead</b>  | <b>RAI16-like</b> | <b>STAT_bind</b> | <b>SH2</b>        | <b>ERK-JNK_inhib</b> | <b>TGF_beta</b>      | <b>Hairy_orange</b> |
| Pfam   | PF00046         | PF00250.         | PF10257           | PF02864          | PF00017           | PF15002              | PF00019              | PF07527             |

**Table S2** The Sequence ID of the Major Genes in the Notch Pathway

|                             | Notch                                  | Delta                                                                                                                                                                    | Jagged                                             | Presenilin                                       | Su(H)                                  |
|-----------------------------|----------------------------------------|--------------------------------------------------------------------------------------------------------------------------------------------------------------------------|----------------------------------------------------|--------------------------------------------------|----------------------------------------|
| Beroe ovata                 | UOYG01025213.1<br>UOYG01025214.1       | -                                                                                                                                                                        | -                                                  | UOYG01004404.<br>1                               | UOYG01023648.1                         |
| Amphimedon queenslandica    | ABZ79675.1<br>(NP_001266228.1)         | XP_019852536.1<br>( <i>Aqu-Delta1</i> )<br>XP_019858177.1<br>( <i>Aqu-Delta2</i> )<br>NP_001292179.1<br>( <i>Aqu-Delta3</i> )<br>NP_001292176.1<br>( <i>Aqu-Delta4</i> ) | -                                                  | XP_019849527.1                                   | XP_011410239.2                         |
| Nematostella vectensis      | AEW42991.1<br>( <i>Nve-Notch</i> )     | AEW42992.1<br>( <i>Nve-Delta</i> )                                                                                                                                       | -                                                  | XP_001625236.1<br>( <i>Nve-Presenilin</i> )      | XP_001633533.1<br>( <i>Nve-Su(H)</i> ) |
| Hydra vulgaris              | NP_001296638.1                         | XP_012561851.1                                                                                                                                                           | AEP83811.1                                         | XP_012561939.1<br>98014984 psn1<br>98020615 psn2 | XP_002162622.2<br>98031429 Su(H)       |
| Schistosoma mansoni         | XP_018647502.1<br>XP_018648078.1       | XP_018655106.1                                                                                                                                                           | XP_018647863.1<br>XP_018649788.1<br>XP_018650604.1 | ABS30416.1                                       | XP_018650960.1                         |
| Echinococcus multilocularis | CDI98240.1                             | CDS35697.1<br>CDS37977.1                                                                                                                                                 | CDS39893.1                                         | CDS40238.1                                       | CDS42579.1                             |
| Lingula anatina             | XP_013419105.1<br>( <i>Lan-Notch</i> ) | XP_013393697.1<br>( <i>Lan-Delta</i> )                                                                                                                                   | XP_013414285.1<br>( <i>Lan-Jagged</i> )            | XP_013414065.1<br>( <i>Lan-Presenilin</i> )      | XP_013403310.1<br>( <i>Lan-Su(H)</i> ) |
| Platynereis dumerilii       | CAJ38792.1                             | AKP06498.1                                                                                                                                                               | AKP06505.1                                         | AKP06494.1                                       | AKP06493.1                             |
| Capitella teleta            | ELT93394.1                             | ELU04539.1                                                                                                                                                               | ELU03755.1                                         | ELU08846.1                                       | ELT98158.1                             |
| Helobdella robusta          | XP_009013849.1,<br>XP_009011066.1      | XP_009015118.1                                                                                                                                                           | XP_009014186.1                                     | XP_009026851.1<br>XP_009024256.1                 | XP_009017036.1<br>XP_009012889.1       |
| Acanthopleura granulata     | model.g31722.t1                        | asembl_69547                                                                                                                                                             | model.g15382.t1                                    | asembl_61426                                     | model.g1803.t1                         |
| Aplysia californica         | XP_012943392.1                         | XP_012938459.1                                                                                                                                                           | XP_012939888.1                                     | NP_001191418.1                                   | XP_012944725.1                         |
| Elysia chlorotica           | RUS91728.1                             | RUS85074.1                                                                                                                                                               | RUS89644                                           | RUS69332.1                                       | RUS90631.1                             |
| Biomphalaria                | XP_013093464.1                         | XP_013094412.1                                                                                                                                                           | XP_013084238.1                                     | XP_013065482.1                                   | XP_013090963.1                         |

|                               |                  |                |                |                   |                |  |
|-------------------------------|------------------|----------------|----------------|-------------------|----------------|--|
|                               | glabrata         |                | XP_009061666.1 |                   |                |  |
| Lottia gigantea               | XP_009044486     | (Lgi-Delta1)   | XP_009055674.1 | XP_009047025.1    | ESO97471.1     |  |
|                               |                  | XP_009046936.1 |                |                   |                |  |
|                               |                  | (Lgi-Delta2)   |                |                   |                |  |
|                               |                  | T19567         |                |                   |                |  |
| Haliotis discus hannai        | T07122           | (Hdh-Delta1)   | T18809         | T19349            | T13741         |  |
|                               | (Hdh-Notch)      | T26181         | (Hdh-Jagged)   | (Hdh-Presenilin)  | (Hdh-Su(H))    |  |
|                               |                  | (Hdh-Delta2)   |                |                   |                |  |
|                               |                  | CGI_10009832   |                |                   |                |  |
| Crassostrea gigas             | CGI_10013186     | (Cgi-Delta1)   | CGI_10023897   | CGI_10019579      | CGI_10018383   |  |
|                               | (XP_011450291.1) | CGI_10013656   | (Cgi-Jagged)   | (Cgi-Presenilin)  | (Cgi-Su(H))    |  |
|                               | (Cgi-Notch)      | (Cgi-Delta2)   |                |                   |                |  |
| Crassostrea virginica         | XP_022322171.1   | XP_022330248.1 | XP_022332849.1 | XP_022332245.1    | XP_022335897.1 |  |
|                               |                  | XP_022320060.1 |                |                   |                |  |
| Mizuhopecten yessoensis       | XP_021352656.1   | XP_021372652.1 | XP_021362559.1 | XP_021349855.1    | OWF47943.1     |  |
|                               |                  | XP_021356594.1 |                |                   |                |  |
| Chlamys farreri               | CF64469.3        | CF63471.32     | CF17725.9      | CF22817.10        | CF64623.4      |  |
|                               |                  | CF493.17       |                |                   |                |  |
|                               |                  | Pma_10018746   |                | Pma_10014008      |                |  |
| Pinctada fucata martensii     | Pma_10025422     | (Pma-Delta1)   | Pma_10000893   | (Pma-presenilin)  | Pma_10008559   |  |
|                               | (Pma-Notch)      | Pma_10023614   | (Pma-Jagged)   | Pma_10009132      | (Pma-Su(H))    |  |
|                               |                  | (Pma-Delta2)   |                | (Presenilin-like) |                |  |
| Octopus bimaculoides          | XP_014776889.1   | XP_014769856.1 | XP_014779348.1 | XP_014785182.1    | XP_014779920.1 |  |
|                               |                  | XP_014771450.1 |                |                   |                |  |
| Octopus vulgaris              | XP_029649022.1   | XP_029638366.1 | XP_029648604.1 | XP_029642727.1    | XP_029650905.1 |  |
|                               |                  | XP_029644317.1 |                |                   |                |  |
| Caenorhabditis elegans        | NP_499007.1      | NP_001024615.1 | -              | NP_508175.1,      | NP_001293739.1 |  |
|                               | NP_499014.1      |                |                | NP_492095.1       |                |  |
| Drosophila melanogaster       | NP_001245510.1   | NP_477264.1    | NP_524527.3    | AAB53369.1        | NP_476868.1    |  |
|                               | (Dme-Notch)      | (Dme-Delta)    | (Dme-Serrate)  | (Dme-Presenilin)  | (Dme-Su(H))    |  |
| Apis mellifera                | XP_006568051.2   | XP_006566475.1 | XP_006564793.1 | XP_396620.5       | XP_016767749.1 |  |
|                               |                  |                | XP_011678556.1 |                   |                |  |
| Strongylocentrotus purpuratus | XP_797451.4      | NP_001027542.1 | XP_011678630.1 | XP_001178715.1    | XP_011673426.1 |  |
|                               |                  |                | XP_011675859.1 |                   |                |  |
| Apostichopus japonicus        | PIK60374.1       | PIK54747.1     | PIK49767.1     | PIK44116.1        | PIK43190.1     |  |
|                               | (Aja-Notch)      | (Aja-Delta)    | (Aja-Jagged)   | (Aja-Presenilin)  | (Aja-Su(H))    |  |
| Saccoglossus kowalevskii      | XP_006818779.1   | NP_001158418.1 | XP_002740519.2 | XP_002738746.1    | XP_006811939.1 |  |
|                               |                  |                |                | XP_039260250.1    |                |  |
| Styela clava                  | XP_039270515.1   | XP_039248161.1 | XP_039254307.1 | (Scl-Presenilin1) | XP_039265104.1 |  |
|                               | (Scl-Notch)      | (Scl-Delta)    | (Scl-Jagged)   | XP_039254919.1    | (Scl-Su(H))    |  |
|                               |                  |                |                | (Scl-Presenilin2) |                |  |
| Branchiostoma                 | XP_019643529.1   | XP_019627312.1 | XP_019633701.1 | XP_019630833.1    | XP_019626796.1 |  |

|              |                                         |                                   |                                        |                                    |                                        |
|--------------|-----------------------------------------|-----------------------------------|----------------------------------------|------------------------------------|----------------------------------------|
| belcheri     |                                         |                                   |                                        |                                    | XP_019647425.1                         |
|              | NP_571516.1<br>( <i>Dre-Notch1a</i> )   | NP_571029.2<br>( <i>Dre-dla</i> ) | XP_005168261.1<br>( <i>Dre-jag1a</i> ) | NP_571099.1<br>( <i>Dre-psn1</i> ) | NP_942579.2<br>( <i>Dre-rbpja</i> )    |
| Danio rerio  | NP_571377.2<br>( <i>Dre-Notch1b</i> )   | NP_571033.1<br>( <i>Dre-dlb</i> ) | NP_571938.2<br>( <i>Dre-jag1b</i> )    | NP_571589.2<br>( <i>Dre-psn2</i> ) | NP_001077020.1<br>( <i>Dre-rbpjb</i> ) |
|              | NP_001108566.2<br>( <i>Dre-Notch2</i> ) | NP_571019.1<br>( <i>Dre-dlc</i> ) | XP_005160542.1<br>( <i>Dre-jag2b</i> ) |                                    |                                        |
|              | NP_571624.2<br>( <i>Dre-Notch3</i> )    | NP_571030.2<br>( <i>Dre-dld</i> ) |                                        |                                    |                                        |
|              | Notch1-NP_032740<br>.3                  |                                   |                                        |                                    |                                        |
|              | Notch2-NP_035058<br>.2                  | XP_011244569.1                    | NP_038850.1                            | NP_001349200.1                     | NP_001074397.1                         |
| Mus musculus | Notch3-NP_032742<br>.1                  | NP_031892.2<br>NP_062327.2        | XP_011242300.1                         | NP_001122077.1                     | NP_033062.1                            |
|              | Notch4-NP_035059<br>.2                  |                                   |                                        |                                    |                                        |
|              | Notch1-NP_060087<br>.3                  |                                   |                                        |                                    |                                        |
|              | Notch2-NP_077719<br>.2                  | NP_005609.3                       | NP_002217.3                            | NP_000012.1                        | NP_001268377.1                         |
| Homo sapiens | Notch3-NP_000426<br>.2                  | NP_061947.1<br>NP_058637.1        | NP_000205.1                            | NP_000438.2                        | NP_001350506.1                         |
|              | Notch4-NP_004548<br>.3                  |                                   |                                        |                                    |                                        |

**Table S3** The *Hes/Hey*-related Genes among metazoans

|                          | Hes                                                                                     | Hey                                                      | Helt | Cwo |
|--------------------------|-----------------------------------------------------------------------------------------|----------------------------------------------------------|------|-----|
| Beroe ovata              | -                                                                                       | -                                                        | -    | -   |
| Amphimedon queenslandica | -                                                                                       | AquHey-XP_0033<br>87453.1                                | -    | -   |
| Nematostella vectensis   | NveHes2-AEW42994.1 or<br>XP_001635328.1<br>NveHes4-AEW42997.1<br>NveHes3-XP_001635326.1 | NveHey-AEW429<br>93.1                                    | -    | -   |
| Hydra vulgaris           | HvuHes-XP_004208005.1                                                                   | -                                                        | -    | -   |
| Hofstenia miamia         | HmiHes-98048776                                                                         | HmiHey-98033833                                          | -    | -   |
| Schistosoma mansoni      | SmaHes1-XP_018647563.1<br>SmaHes2-XP_018653208.1                                        | SmaHey1-XP_018<br>649397.1<br>SmaHey2-XP_018<br>649396.1 | -    | -   |
| Echinococcus             | EmuHes-CDS38030.1                                                                       | EmuHey-CDS426                                            | -    | -   |

|                         |                         |                 |                        |                      |
|-------------------------|-------------------------|-----------------|------------------------|----------------------|
| multilocularis          |                         | 97.1            |                        |                      |
|                         | LanHES1-XP_013381587    |                 |                        |                      |
|                         | LanHES2-XP_013381582    |                 |                        |                      |
|                         | LanHES3-XP_013383390    |                 |                        |                      |
|                         | LanHES4-XP_013383388    |                 |                        |                      |
|                         | LanHES5-XP_013403236    |                 |                        |                      |
| Lingula anatina         | LanHES6-XP_013412582    | LanHey-XP_0134  | -                      | LanCwo1-XP_013419897 |
|                         | LanHES7-XP_013412583    | 14701           |                        | LanCwo2-XP_013380691 |
|                         | LanHES8-XP_013412580    |                 |                        |                      |
|                         | LanHES9-XP_013395724    |                 |                        |                      |
|                         | LanHES10-XP_013395728   |                 |                        |                      |
|                         | LanHES11-XP_013395690   |                 |                        |                      |
|                         | LanHES12-XP_013390924   |                 |                        |                      |
|                         | PduHes1-AGS55435.1      |                 |                        |                      |
|                         | PduHes2-AGS55436.1      |                 |                        |                      |
|                         | PduHes3-AGS55437.1      |                 |                        |                      |
|                         | PduHes4-AGS55438.1      |                 |                        |                      |
|                         | PduHes5-AGS55439.1      |                 |                        |                      |
| Platynereis dumerilii   | PduHes6-AGS55440.1      | PduHey1-AGS554  | -                      | PduCwo-AGS55449.1    |
|                         | PduHes7-AGS55441.1      | 48.1            |                        |                      |
|                         | PduHes8-AGS55442.1      |                 |                        |                      |
|                         | PduHes9-AGS55443.1      |                 |                        |                      |
|                         | PduHes10-AGS55444.1     |                 |                        |                      |
|                         | PduHes11-AGS55445.1     |                 |                        |                      |
|                         | PduHes12-AGS55446.1     |                 |                        |                      |
|                         | PduHes13-AGS55447.1     |                 |                        |                      |
|                         | CteHes1-ELU08377        |                 |                        |                      |
|                         | CteHes2-ELU08376        | CteHey1-ELU089  |                        |                      |
|                         | CteHes3-ELU10814        | 81              | -                      | CteCwo-ELU02556      |
| Capitella teleta        | CteHes4-ELU10815        | CteHey2-ELU089  |                        |                      |
|                         | CteHes5-ELT92193        | 80              |                        |                      |
|                         | HroHES1-XP_009020819    |                 |                        |                      |
|                         | HroHES2-XP_009022784    |                 |                        |                      |
| Helobdella robusta      | HroHES3-XP_009023789    | HroHey-XP_0090  | -                      | -                    |
|                         | HroHES4-XP_009023790    | 14197           |                        |                      |
|                         | HroHES5-XP_009023792    |                 |                        |                      |
|                         | AgrHes1-model.g30019.t1 |                 |                        |                      |
|                         | AgrHes2-model.g30018.t1 |                 |                        |                      |
|                         | AgrHes3-model.g30014.t1 |                 |                        |                      |
| Acanthopleura granulata | AgrHes4-model.g30046.t1 | AgrHey-model.g1 | AgrHelt-model.g4531.t1 | -                    |
|                         | AgrHes5-model.g30020.t1 | 9192.t1         |                        |                      |
|                         | AgrHes6-model.g31256.t1 |                 |                        |                      |
|                         | AgrHes7-model.g29508.t1 |                 |                        |                      |
| Aplysia                 | AcaHes1-XP_005109821    | AcaHey-XP_0129  | --                     | AcaCwo-XP_012935276  |

|                           |                       |                 |                      |                        |
|---------------------------|-----------------------|-----------------|----------------------|------------------------|
| californica               | AcaHes2-XP_012945161  | 40775           |                      |                        |
|                           | AcaHes3-XP_005104468  |                 |                      |                        |
|                           | EchHes1-RUS81509.1    |                 |                      |                        |
|                           | EchHes2-RUS85462.1    |                 |                      |                        |
|                           | EchHes3-RUS85031.1    | EchHey-RUS8730  |                      |                        |
| Elysia chlorotica         | EchHes4-RUS87118.1    | 0.1             | -                    | EchCwo-RUS91494.1      |
|                           | EchHes5-RUS83438.1    |                 |                      |                        |
|                           | EchHes6-RUS72576.1    |                 |                      |                        |
|                           | BglHes1-XP_013095166  |                 |                      |                        |
|                           | BglHes2-XP_013088757  |                 |                      |                        |
| Biomphalaria<br>glabrata  | BglHes3-XP_013075104  | BglHey-XP_01306 |                      |                        |
|                           | BglHes4-XP_013087343  | 7329            | -                    | BglCwo-XP_013080510    |
|                           | BglHes5-XP_013088081  |                 |                      |                        |
|                           | LgiHes1-XP_009064533  |                 |                      |                        |
|                           | LgiHes2-XP_009058075  |                 |                      |                        |
| Lottia gigantea           | LgiHes3-XP_009057811  |                 |                      |                        |
|                           | LgiHes4-XP_009058863  |                 |                      |                        |
|                           | LgiHes5-XP_009049759  |                 |                      |                        |
|                           | LgiHes6-XP_009053615  | LgiHey-XP_00904 | LgiHelt-XP_009045357 | LgiCwo-XP_009053558    |
|                           | LgiHes7-XP_009053062  | 6688            |                      |                        |
| Haliotis discus<br>hannai | LgiHes8-XP_009058074  |                 |                      |                        |
|                           | LgiHes9-XP_009064532  |                 |                      |                        |
|                           | LgiHes10-XP_009064534 |                 |                      |                        |
|                           | LgiHes11-XP_009064535 |                 |                      |                        |
|                           | HdhHes1-T00679        |                 |                      |                        |
| Crassostrea gigas         | HdhHes2-T00683        | HdhHey-T01691   | -                    | HdhCwo-T09094          |
|                           | CgiHes1-XP_011426791  |                 |                      |                        |
|                           | CgiHes2-XP_011426827  |                 |                      |                        |
|                           | CgiHes3-XP_011434420  |                 |                      |                        |
|                           | CgiHes4-XP_011442866  |                 |                      |                        |
| Crassostrea<br>virginica  | CgiHes5-XP_011434419  | CgiHey-XP_01144 | CgiHelt-XP_011454244 | CgiCwo1-XP_011423628   |
|                           | CgiHes6-XP_011456332  | 6705            |                      | CgiCwo2-XP_011423478   |
|                           | CgiHes7-XP_011456334  |                 |                      |                        |
|                           | CgiHes8-XP_011456335  |                 |                      |                        |
|                           | CgiHes9-XP_011418427  |                 |                      |                        |
| Mizuhopecten              | CgiHes10-XP_011418430 |                 |                      |                        |
|                           | CviHes1-LOC111132480  |                 |                      |                        |
|                           | CviHes2-LOC111133867  |                 |                      |                        |
|                           | CviHes3-LOC111099184  | CviHey-LOC1111  | CviHelt-LOC111120884 | CviCwo1-XP_022302549.1 |
|                           | CviHes4-LOC111135582  | 31773           |                      | CviCwo2-XP_022301976.1 |
| Mizuhopecten              | CviHes5-LOC111132221  |                 |                      |                        |
|                           | CviHes6-LOC111132222  |                 |                      |                        |
|                           | CviHes7-LOC111138134  |                 |                      |                        |
| Mizuhopecten              | MyeHes1-XP_021342518  | MyeHey-XP_0213  | MyeHelt-XP_021340917 | MyeCwo-XP_021371008    |

|                              |                                                                                                                                                                                                                                                                                                                                            |                                              |                        |                                        |
|------------------------------|--------------------------------------------------------------------------------------------------------------------------------------------------------------------------------------------------------------------------------------------------------------------------------------------------------------------------------------------|----------------------------------------------|------------------------|----------------------------------------|
| yessoensis                   | MyeHes2-XP_021364693<br>MyeHes3-XP_021350063<br>MyeHes4-XP_021372905<br>MyeHes5-XP_021363795<br>MyeHes6-XP_021355435<br>CfaHes1-CF20445.6<br>CfaHes2-CF57753.3                                                                                                                                                                             | 56185                                        |                        |                                        |
| Chlamys farreri              | CfaHes3-CF59079.38<br>CfaHes4-CF64955.1<br>CfaHes5-CF59079.39                                                                                                                                                                                                                                                                              | CfaHey-CF63447.<br>3                         | CfaHelt-CF55315.5      | CfaCwo-CF43523.5                       |
| Pinctada fucata<br>martensii | PmaHes1-10022586<br>PmaHes2-10012161<br>PmaHes3-10022584                                                                                                                                                                                                                                                                                   | PmaHey1-1000066<br>2<br>PmaHey2-1001999<br>9 | PmaHelt-10020900       | PmaCwo1-10029931                       |
| Octopus vulgaris             | OvuHes-XP_029657891.1                                                                                                                                                                                                                                                                                                                      | -                                            | OvuHelt-XP_029638240.1 | OvuCwo-XP_029635006.1                  |
| Octopus<br>bimaculoides      | ObiHes-XP_014772623                                                                                                                                                                                                                                                                                                                        | ObiHey-XP_01476<br>7679                      | ObiHelt-XP_014781134   | ObiCwo-XP_014773539                    |
| Caenorhabditis<br>elegans    | CelHes-NP_500281.1<br><br>DmeHes1-NP_524509<br>( <i>Dme-E(spl)m3</i> )<br>DmeHes2-NP_524505<br>( <i>Dme-E(spl)mbeta</i> )<br>DmeHes3-NP_536753<br>( <i>Dme-E(spl)m7</i> )<br>DmeHes4-NP_524504<br>( <i>Dme-E(spl)mgamma</i> )<br>DmeHes5-NP_525094 ( <i>Dme-Hesr</i> ),                                                                    | -                                            | -                      | -                                      |
| Drosophila<br>melanogaster   | DmeHes6-HLH-NP_524503<br>( <i>Dme-E(spl)mdelta</i> )<br>DmeHes7-NP_524511<br>( <i>Dme-E(spl)m5</i> )<br>DmeHes8-NP_524513<br>( <i>Dme-E(spl)m8</i> )<br>DmeHes9-NP_476923 ( <i>Dme-dpn</i> ),<br>DmeHes10-NP_523599<br>( <i>Dme-Sidpn</i> )<br>DmeHes11-NP_523977<br>( <i>Dme-hairy</i> )<br>AmeHes1-XP_393312.1<br>AmeHes2-XP_001120327.2 | DmeHey-NP_5236<br>57 ( <i>Dme-Hey</i> )      | -                      | DmeCwo-NP_524775<br>( <i>Dme-Cwo</i> ) |
| Apis mellifera               | AmeHes3-XP_003249471.2<br>AmeHes4-XP_001120814.2<br>AmeHes5-XP_006559646.1                                                                                                                                                                                                                                                                 | AmeHey-XP_0262<br>99131.1                    | -                      | AmeCwo-XP_026300267.1                  |

|                                                |                                         |                                          |                        |   |
|------------------------------------------------|-----------------------------------------|------------------------------------------|------------------------|---|
|                                                | AmeHes6-XP_393948.3                     |                                          |                        |   |
|                                                | SpuHes1-NP_001001768.2                  |                                          |                        |   |
| Strongylocentrotus purpuratus                  | SpuHes2-XP_787040.2                     | SpuHey-XP_7836                           |                        |   |
|                                                | SpuHes3-XP_796692.2                     | 76.2                                     | -                      | - |
|                                                | SpuHes4-XP_030843279.1                  |                                          |                        |   |
|                                                | SpuHes5-XP_030843275.1                  |                                          |                        |   |
|                                                | AjaHes1-PIK61026.1                      |                                          |                        |   |
| Apostichopus japonicus                         | AjaHes2-PIK35797.1                      | AjaHey-PIK40047                          |                        |   |
|                                                | AjaHes3-PIK37883.1                      | .1                                       | -                      | - |
|                                                | AjaHes4-PIK58850.1                      |                                          |                        |   |
| Saccoglossus kowalevskii                       |                                         | SkoHey1-NP_001158466.1                   |                        |   |
|                                                |                                         | 158467.1                                 | SkoHelt-NP_001161564.1 |   |
|                                                |                                         | SkoHey2-XP_006811443                     |                        |   |
| Styela clava                                   | SclHes1-XP_039251338.1                  |                                          |                        |   |
|                                                | SclHes2-XP_039259018.1                  | SclHey-XP_039261038.1                    | -                      | - |
|                                                | SclHes3-XP_039250505.1                  |                                          |                        |   |
|                                                | BbeHes1-XP_019637861.1                  |                                          |                        |   |
|                                                | BbeHes2-XP_019637894.1                  |                                          |                        |   |
| Branchiostoma belcheri                         | BbeHes3-XP_019637880.1                  |                                          |                        |   |
|                                                | BbeHes4-XP_019628064.1                  | BbeHey1-XP_019641636.1                   |                        |   |
|                                                | BbeHes5-XP_019628076.1                  |                                          |                        |   |
|                                                | BbeHes6-XP_019628086.1                  | BbeHey2-XP_019647772.1                   | -                      | - |
|                                                | BbeHes7-XP_019628069.1                  |                                          |                        |   |
|                                                | BbeHes8-XP_019633323.1                  |                                          |                        |   |
|                                                | BbeHes9-XP_019627214.1                  |                                          |                        |   |
|                                                | BbeHes10-XP_019633783.1                 |                                          |                        |   |
|                                                | DreHes1-NP_571155.1 ( <i>Dre-her3</i> ) |                                          |                        |   |
|                                                | DreHes2-NP_571154.2 ( <i>Dre-her6</i> ) |                                          |                        |   |
| DreHes3-NP_571948.1 ( <i>Dre-her9</i> )        |                                         |                                          |                        |   |
| DreHes4-NP_001116717.1 ( <i>Dre-hes2.1</i> )   |                                         |                                          |                        |   |
| DreHes5-NP_001038818.1 ( <i>Dre-hes2.2</i> )   | DreHey1-NP_997726.1 ( <i>Dre-hey1</i> ) |                                          |                        |   |
| DreHes6-NP_955918.3 ( <i>Dre-her8a</i> )       | DreHey2-NP_571697.2 ( <i>Dre-hey2</i> ) | DreHelt-NP_996948.1 ( <i>Dre-helts</i> ) | -                      |   |
| DreHes7-XP_003199574.1 ( <i>Dre-her15.1</i> )  | DreHey3-NP_859425.1 ( <i>Dre-hey1</i> ) |                                          |                        |   |
| DreHes8-XP_021324225.1 ( <i>Dre-E(spl)m7</i> ) |                                         |                                          |                        |   |
| DreHes9-NP_878295.1 ( <i>Dre-her15.1</i> )     |                                         |                                          |                        |   |
| DreHes10-NP_001159638.1 ( <i>Dre-her8.2</i> )  |                                         |                                          |                        |   |



|              |                        |                |                      |   |
|--------------|------------------------|----------------|----------------------|---|
|              | MmuHes1-NP_032261.1    | MmuHey1-NP_03  |                      |   |
|              | MmuHes2-NP_001288734.1 | 4553.2         |                      |   |
| Mus musculus | MmuHes3-NP_032263.2    | MmuHey2-NP_03  | MmuHelt-NP_776150.2  | - |
|              | MmuHes4-NP_001357684.1 | 8932.1         |                      |   |
|              | MmuHes5-NP_062352.1    | MmuHey3-NP_03  |                      |   |
|              | MmuHes6-NP_149030.2    | 8933.2         |                      |   |
|              | HsaHes1-NP_001019769   |                |                      |   |
|              | HsaHes2-NP_001010926   | HsaHey1-NP_036 |                      |   |
|              | HsaHes3-NP_061962      | 390            |                      |   |
| Homo sapiens | HsaHes4-NP_061115      | HsaHey-2NP_036 | HsaHelt-NP_001025058 | - |
|              | HsaHes5-NP_005515      | 391            |                      |   |
|              | HsaHes6-NP_066993      | HsaHey-3NP_055 |                      |   |
|              | HsaHes7-NP_003661      | 386            |                      |   |
|              | HsaHes8-NP_110389      |                |                      |   |

**Table S4** The FPKM/RPKM and abbreviations of the developmental stages.  
See excel file “supplementary Table S4.xlsx”.

**Table S5** The Core Domains of Developmental Pathways.

|            | TGF- $\beta^a$ |     | Wnt <sup>b</sup> |     | Jak/STAT <sup>c</sup> |           | RPTK <sup>d</sup> |         | Notch <sup>e</sup> |      |     | Hedgehog <sup>f</sup> |           | RA <sup>g</sup> | Fox <sup>h</sup> | Hox <sup>i</sup> | ERK <sup>j</sup> |               |
|------------|----------------|-----|------------------|-----|-----------------------|-----------|-------------------|---------|--------------------|------|-----|-----------------------|-----------|-----------------|------------------|------------------|------------------|---------------|
|            | Activin_recp   | MH2 | TGF_beta         | Wnt | Frizzled              | STAT_bind | SH2               | Insulin | FGF                | EGF  | DSL | bHLH                  | HH_signal | TALPID3         | RAI16-like       | Forkhead         | Homeobox         | ERK-JNK_inhib |
| <i>Bov</i> | 2              | 6   | 8                | 5   | 4                     | 3         | 29                | -       | 5                  | 57   | 25  | 43                    | -         | -               | -                | 22               | 69               | 1             |
| <i>Aqu</i> | 2              | 4   | 8                | 5   | 5                     | 2         | 87                | -       | 2                  | 225  | 12  | 23                    | 1         | -               | 2                | 19               | 33               | 1             |
| <i>Nve</i> | 3              | 5   | 7                | 19  | 7                     | 1         | 25                | 2       | 14                 | 643  | 24  | 51                    | 2         | -               | 2                | 27               | 94               | 1             |
| <i>Hvu</i> | 2              | 4   | 12               | 11  | 3                     | 1         | 47                | 1       | 12                 | 172  | 16  | 29                    | 4         | 2               | 2                | 16               | 46               | 1             |
| <i>Hmi</i> | 1              | 6   | 6                | 6   | 8                     | 1         | 60                | -       | 3                  | 33   | 1   | 39                    | 1         | 1               | -                | 17               | 90               | 2             |
| <i>Sma</i> | 1              | 9   | 2                | 8   | 9                     | -         | 33                | -       | -                  | 43   | 6   | 35                    | 1         | -               | 2                | 16               | 75               | 1             |
| <i>Emu</i> | -              | 7   | 3                | 7   | 9                     | -         | 44                | -       | -                  | 42   | 8   | 31                    | 2         | -               | 2                | 16               | 81               | -             |
| <i>Lan</i> | 4              | 10  | 11               | 13  | 5                     | 2         | 65                | 2       | 3                  | 1427 | 6   | 77                    | 1         | 2               | 2                | 27               | 114              | 2             |
| <i>Cie</i> | 3              | 4   | 14               | 12  | 5                     | 5         | 42                | 2       | 1                  | 571  | 7   | 82                    | 1         | 3               | 2                | 42               | 145              | 1             |
| <i>Hro</i> | 2              | 9   | 8                | 19  | 4                     | 2         | 60                | -       | -                  | 230  | 3   | 67                    | 1         | -               | 1                | 32               | 243              | 1             |
| <i>Agr</i> | 2              | 5   | 12               | 10  | 5                     | 2         | 51                | 4       | 5                  | 227  | 11  | 67                    | 1         | 2               | 2                | 35               | 144              | 1             |
| <i>Ech</i> | 2              | 3   | 13               | 12  | 5                     | 1         | 46                | 6       | 3                  | 138  | 13  | 64                    | 2         | 1               | 1                | 21               | 93               | 1             |
| <i>Aca</i> | 1              | 5   | 12               | 16  | 5                     | 1         | 52                | 4       | 4                  | 292  | 12  | 64                    | 2         | 2               | 2                | 19               | 90               | 1             |
| <i>Bgl</i> | 1              | 7   | 14               | 18  | 5                     | 2         | 55                | 2       | 3                  | 280  | 16  | 73                    | 1         | 2               | 3                | 18               | 86               | 1             |
| <i>Lgi</i> | 4              | 5   | 10               | 12  | 5                     | 2         | 28                | 3       | 2                  | 334  | 6   | 77                    | 1         | 1               | 3                | 31               | 141              | 1             |
| <i>Hdh</i> | 3              | 4   | 9                | 14  | 6                     | 1         | 58                | 3       | 4                  | 447  | 19  | 77                    | 6         | 1               | 2                | 25               | 145              | -             |
| <i>Cgi</i> | 4              | 8   | 13               | 13  | 5                     | 1         | 51                | 2       | 1                  | 633  | 19  | 78                    | 1         | 2               | 2                | 26               | 131              | 1             |
| <i>Cvi</i> | 4              | 13  | 18               | 13  | 5                     | 3         | 78                | 4       | 2                  | 821  | 24  | 101                   | 3         | 2               | 2                | 33               | 144              | 1             |
| <i>Mye</i> | 4              | 6   | 13               | 12  | 5                     | 3         | 63                | 2       | 2                  | 593  | 27  | 69                    | 6         | 2               | 2                | 25               | 134              | 1             |
| <i>Cfa</i> | 3              | 6   | 14               | 13  | 6                     | 3         | 55                | 2       | 2                  | 450  | 16  | 66                    | 6         | 1               | 2                | 27               | 130              | 1             |
| <i>Pma</i> | 2              | 6   | 12               | 10  | 8                     | 2         | 52                | 1       | 2                  | 475  | 10  | 59                    | 3         | 2               | 2                | 39               | 134              | -             |
| <i>Ovu</i> | 1              | 5   | 10               | 12  | 7                     | 1         | 50                | 1       | 2                  | 425  | 16  | 51                    | 2         | -               | 2                | 16               | 82               | 1             |
| <i>Obi</i> | 1              | 6   | 11               | 13  | 5                     | 1         | 42                | 1       | 4                  | 267  | 7   | 48                    | 3         | 1               | 2                | 19               | 81               | 1             |

|            |     |     |     |     |     |    |      |     |     |              |            |             |    |    |    |     |      |    |
|------------|-----|-----|-----|-----|-----|----|------|-----|-----|--------------|------------|-------------|----|----|----|-----|------|----|
| <i>Cel</i> | 3   | 20  | 5   | 5   | 8   | 3  | 43   | 1   | 2   | 88           | 12         | 54          | -  | -  | 1  | 24  | 131  | 1  |
| <i>Dme</i> | 5   | 6   | 7   | 8   | 6   | 1  | 31   | 6   | 3   | 105          | 2          | 55          | 1  | -  | 1  | 18  | 108  | -  |
| <i>Ame</i> | 10  | 5   | 8   | 6   | 2   | 1  | 35   | 2   | 4   | 139          | 2          | 71          | 1  | -  | 2  | 16  | 99   | 1  |
| <i>Spu</i> | 2   | 8   | 18  | 16  | 8   | 1  | 60   | 5   | 5   | 2933         | 21         | 65          | 1  | 2  | 2  | 24  | 130  | 1  |
| <i>Aju</i> | 1   | 5   | 13  | 16  | 5   | 1  | 71   | 1   | -   | 661          | 2          | 35          | -  | 3  | 2  | 24  | 82   | 1  |
| <i>Sko</i> | 2   | 7   | 23  | 13  | 6   | 1  | 45   | 2   | 7   | 1161         | 6          | 63          | 1  | 2  | 3  | 41  | 142  | 1  |
| <i>Sel</i> | 3   | 4   | 14  | 17  | 8   | 3  | 55   | -   | 6   | 452          | 3          | 46          | 2  | 2  | 2  | 35  | 115  | 2  |
| <i>Bbe</i> | 5   | 5   | 16  | 13  | 7   | 2  | 62   | 5   | 10  | 1499         | 2          | 86          | 3  | 2  | 2  | 27  | 141  | 1  |
| <i>Dre</i> | 13  | 15  | 14  | 26  | 15  | 8  | 147  | 14  | 32  | 417          | 10         | 149         | 4  | 1  | 8  | 69  | 232  | 1  |
| <i>Mmu</i> | 11  | 8   | 41  | 20  | 12  | 7  | 116  | 11  | 22  | 278          | 4          | 138         | 4  | 1  | 5  | 43  | 305  | 1  |
| <i>Hsa</i> | 10  | 7   | 21  | 40  | 12  | 8  | 128  | 15  | 26  | 336          | 4          | 126         | 4  | 1  | 4  | 48  | 290  | 1  |
| Total      | 117 | 233 | 435 | 453 | 220 | 76 | 1966 | 104 | 193 | <u>16894</u> | <u>372</u> | <u>2259</u> | 72 | 41 | 74 | 937 | 4300 | 33 |

The line means none. The domains of Notch Pathway are underlined.

a Activin is a TGF receptor; MH2 is a domain of Smad; TGF\_beta is a multifunctional peptide of TGF-β.

b Wnt is a family of Wnt signaling pathway. Frizzled is related to Wnt and Hedgehog.

c STAT proteins are a family of transcription factors of Jak/STAT, SH2 is a conserved domain included in both STAT and RPTK signaling pathway.

d Insulin, FGF and EGF are subfamilies of receptor protein-tyrosine kinase (RPTK) pathway.

e EGF is contained in the Notch ligand as well. DSL is the key domain of Notch ligands while bHLH is the key domain of Notch target genes.

f HH\_signal is an amino-terminal signaling domain of Hedgehog pathway. TALPID3 is a family of eukaryotic proteins that are targets for Hedgehog signaling;

g RAI16-like is a retinoic acid-induced protein 16-like proteins of retinoic acid (RA) signaling pathway.

h Forkhead domain is a conserved DNA-binding domain of fox gene.

i Homebox is a domain of transcriptional regulators which encoded by Hox genes.

j ERK-JNK\_inhib is an inhibitor of extracellular signal-regulated kinases (ERK).

Colors of background for the species represent different phylum. White is Ctenophora, light grey is Porifera, light blue is Cnidaria, dark blue is Xenacoelomorpha, blue is Lophotrochozoa, orange is Ecdysozoa, red is Ambulacrum (Echinodermata and Hemichordata) and green is Chordata (the same below). *Platynereis dumerilii* was discarded due to lack of proteome.

Abbreviation of species are showed in Materials & Methods.

**Table S6** Domains of the Major Genes in the Notch Pathway

|              | Notch | DSL | EGF   | VWC  | Presenilin | BTD | LAG1-DN<br>Abind | bHLH | Hairy<br>orange |
|--------------|-------|-----|-------|------|------------|-----|------------------|------|-----------------|
| <i>Bov</i>   | 8     | 25  | 57    | 9    | 1          | 1   | 1                | 43   | 7               |
| <i>Aqu</i>   | 5     | 12  | 225   | 4    | 1          | 1   | 1                | 23   | 1               |
| <i>Nve</i>   | 3     | 24  | 643   | 10   | 1          | 1   | 1                | 51   | 5               |
| <i>Hvu</i>   | 5     | 16  | 172   | 12   | 1          | 1   | 1                | 29   | -               |
| <i>Hmi</i>   | -*    | 1*  | 33*   | 3*   | 1          | 1   | 1                | 39   | 1               |
| <i>Sma</i>   | 2     | 6   | 43    | -    | 1          | 1   | 1                | 35   | 1               |
| <i>Emu</i>   | 4     | 8   | 42    | 1    | 1          | 1   | 1                | 31   | -               |
| <i>Lan</i>   | 13    | 6   | 1427  | 52   | 1          | 1   | 1                | 77   | 10              |
| <i>Cte</i>   | 7     | 7   | 571   | 17   | 1          | 1   | 1                | 82   | 8               |
| <i>Hro</i>   | 5     | 3   | 230   | 5    | 2          | 2   | 2                | 67   | 2               |
| <i>Agr</i>   | 6     | 11  | 227   | 52   | 1          | 1   | 1                | 67   | 11              |
| <i>Ech</i>   | 3     | 13  | 138   | 26   | 1          | 1   | 1                | 64   | 7               |
| <i>Aca</i>   | 6     | 12  | 292   | 39   | 1          | 1   | 1                | 64   | 5               |
| <i>Bgl</i>   | 8     | 16  | 280   | 16   | 1          | 1   | 1                | 73   | 10              |
| <i>Lgi</i>   | 5     | 6   | 334   | 41   | 1          | 1   | 1                | 77   | 7               |
| <i>Hdh</i>   | 5     | 19  | 447   | 30   | 1          | 2   | 2                | 77   | 11              |
| <i>Cgi</i>   | 6     | 19  | 633   | 44   | 1          | 1   | 1                | 78   | 10              |
| <i>Cvi</i>   | 7     | 24  | 821   | 74   | 1          | 1   | 1                | 101  | 9               |
| <i>Mye</i>   | 8     | 27  | 593   | 42   | 1          | 1   | 1                | 69   | 7               |
| <i>Cfa</i>   | 8     | 16  | 450   | 32   | 1          | 1   | 1                | 66   | 7               |
| <i>Pma</i>   | 7     | 10  | 475   | 38   | 3          | 1   | 1                | 59   | 6               |
| <i>Ovu</i>   | 8     | 16  | 425   | 38   | 1          | 1   | 1                | 51   | 1               |
| <i>Obi</i>   | 5     | 7   | 267   | 39   | 1          | 1   | 1                | 48   | 4               |
| <i>Cel</i>   | 6     | 12  | 88    | 12   | 2          | 1   | 1                | 54   | -               |
| <i>Dme</i>   | 4     | 2   | 105   | 9    | 1          | 1   | 1                | 55   | 11              |
| <i>Ame</i>   | 4     | 2   | 139   | 34   | 1          | 1   | 1                | 71   | 9               |
| <i>Spu</i>   | 6     | 21  | 2933  | 91   | 1          | 1   | 1                | 65   | 7               |
| <i>Aja</i>   | 4     | 2   | 661   | 60   | 1          | 1   | 1                | 35   | 4               |
| <i>Sko</i>   | 8     | 6   | 1161  | 45   | 1          | 1   | 1                | 63   | 5               |
| <i>Scl</i>   | 5     | 3   | 452   | 47   | 2          | 2   | 2                | 46   | 3               |
| <i>Bbe</i>   | 6     | 2   | 1499  | 90   | 1          | 2   | 2                | 86   | 11              |
| <i>Dre</i>   | 16    | 10  | 417   | 68   | 2          | 3   | 3                | 149  | 15              |
| <i>Mmu</i>   | 17    | 4   | 278   | 60   | 2          | 2   | 2                | 138  | 11              |
| <i>Hsa</i>   | 18    | 4   | 336   | 63   | 2          | 2   | 2                | 126  | 11              |
| <b>Total</b> | 228   | 371 | 16861 | 1200 | 42         | 42  | 42               | 2259 | 217             |

**Figure S1. DSL domain phylogeny across lophotrochozoans.** (a) The phylogenetic tree was constructed using the DSL domains from 138 DSL family genes using maximum likelihood methods. Clades with different colours represent different domain arrangements shown in (b). Red indicates *Jagged* containing DSL, EGF, MNLL, and VWC. Orange indicates *Delta* containing DSL, EGF, and MNLL. Blue represents genes containing DSL and EGF domains. Purple represents genes containing DSL or DSL repeats but not EGF. Different DSL domains in the same gene are indicated by '-' after the gene ID. (b) Domain diagram of DSL family. DSL domain protein sequences are given in Supplementary Data 2. See "Figure S1.pdf" file.

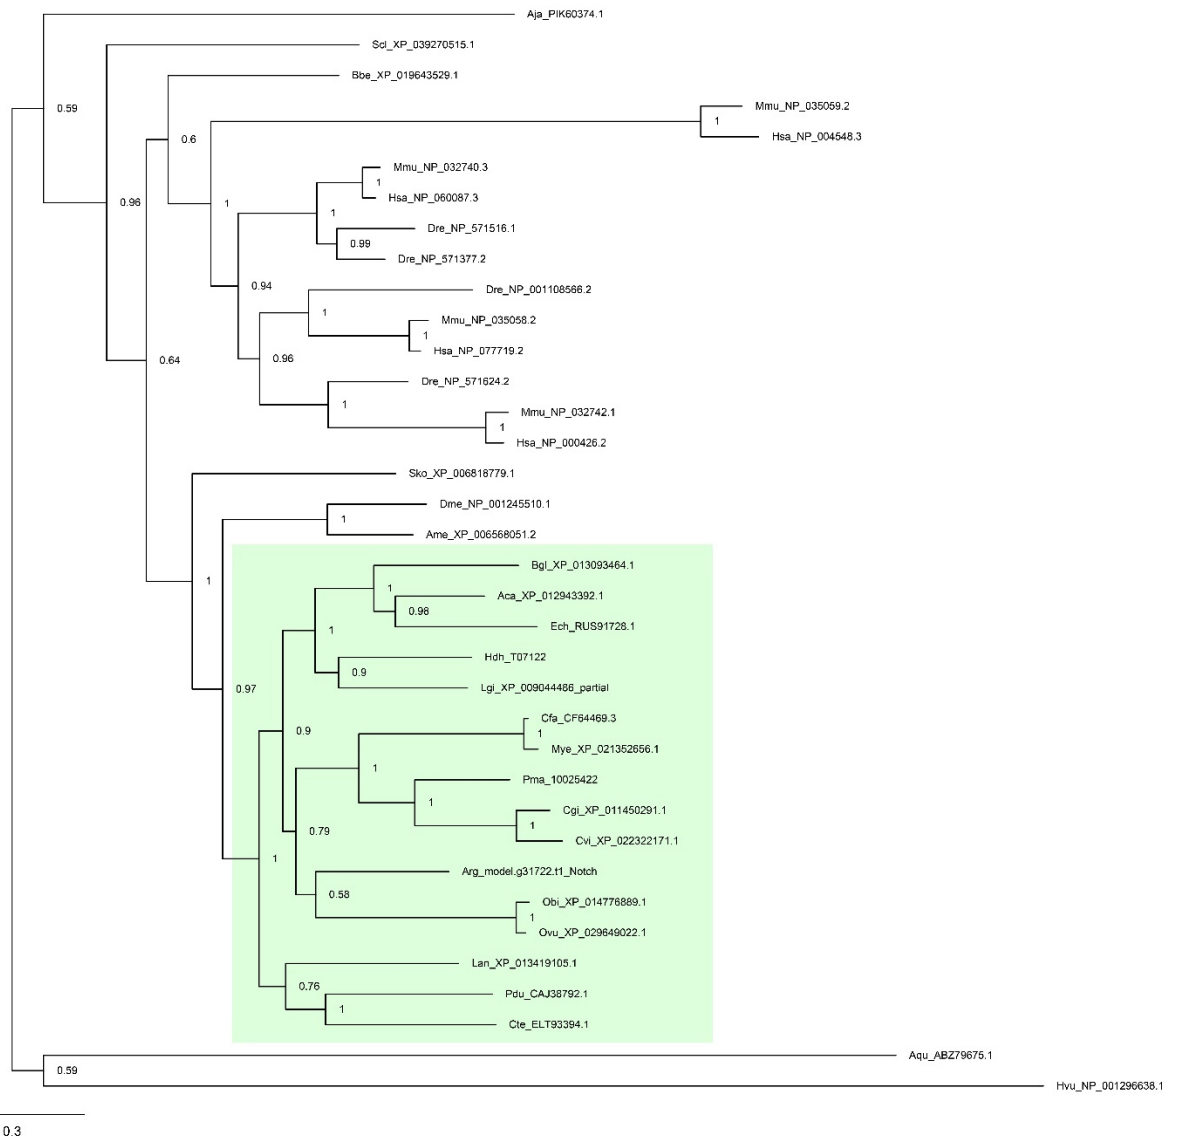

**Figure S2. Phylogeny of *Notch* genes across metazoans.** The phylogenetic tree was constructed using 36 *Notch* genes from 27 complete metazoan genomes using the maximum likelihood method. Fasttree support values are shown at the basal node. Lophotrochozoans are shown in green. The protein sequences of these genes are shown in Supplementary Data 4.

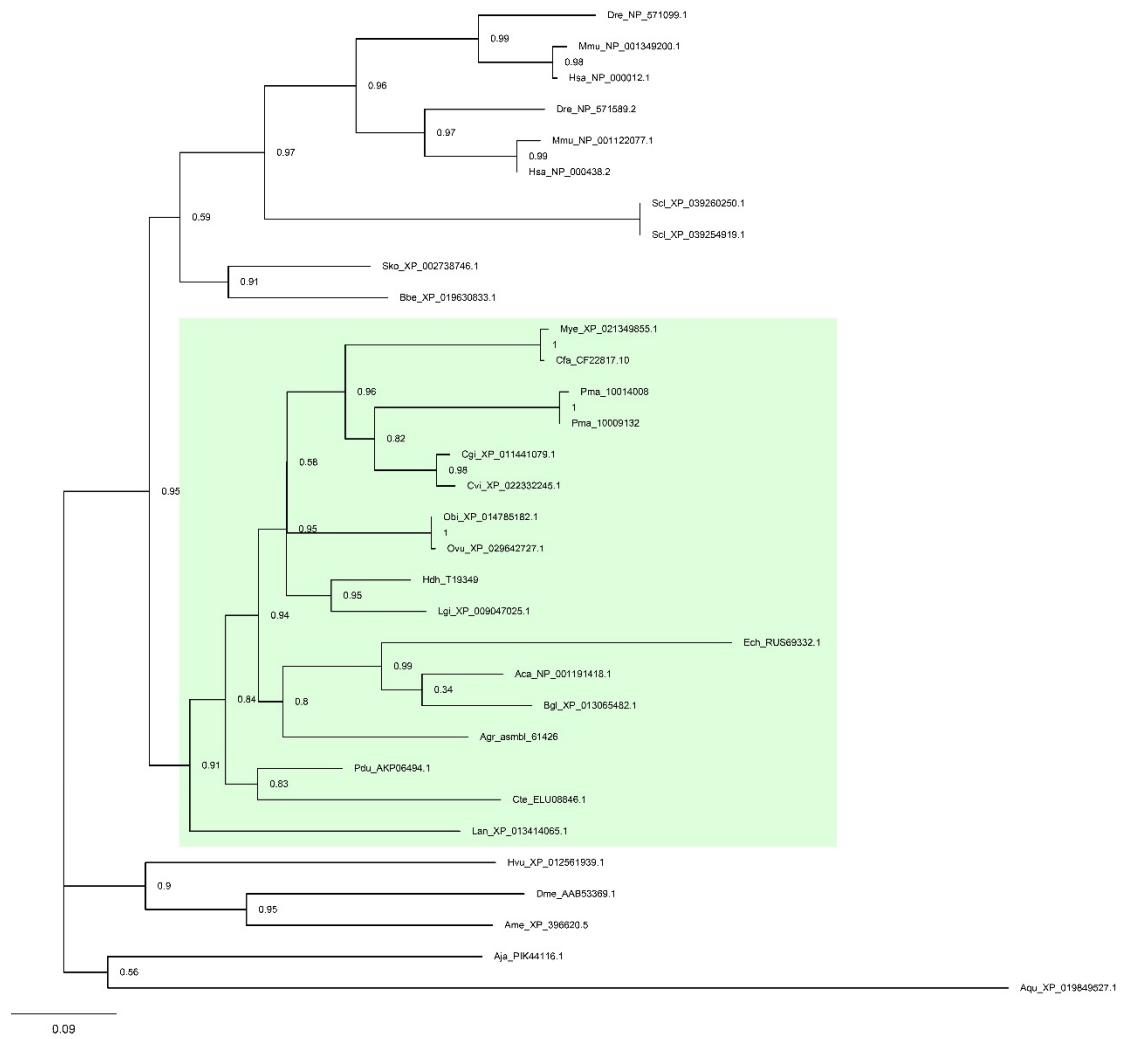

**Figure S3. Phylogeny of *Presenilin* genes across metazoans.** The phylogenetic tree was constructed using 32 *Presenilin* genes from 27 complete metazoan genomes using the maximum likelihood method. Fasttree support values are shown at the basal node. Lophotrochozoans are shown in green. The protein sequences of these genes are shown in Supplementary Data 5.

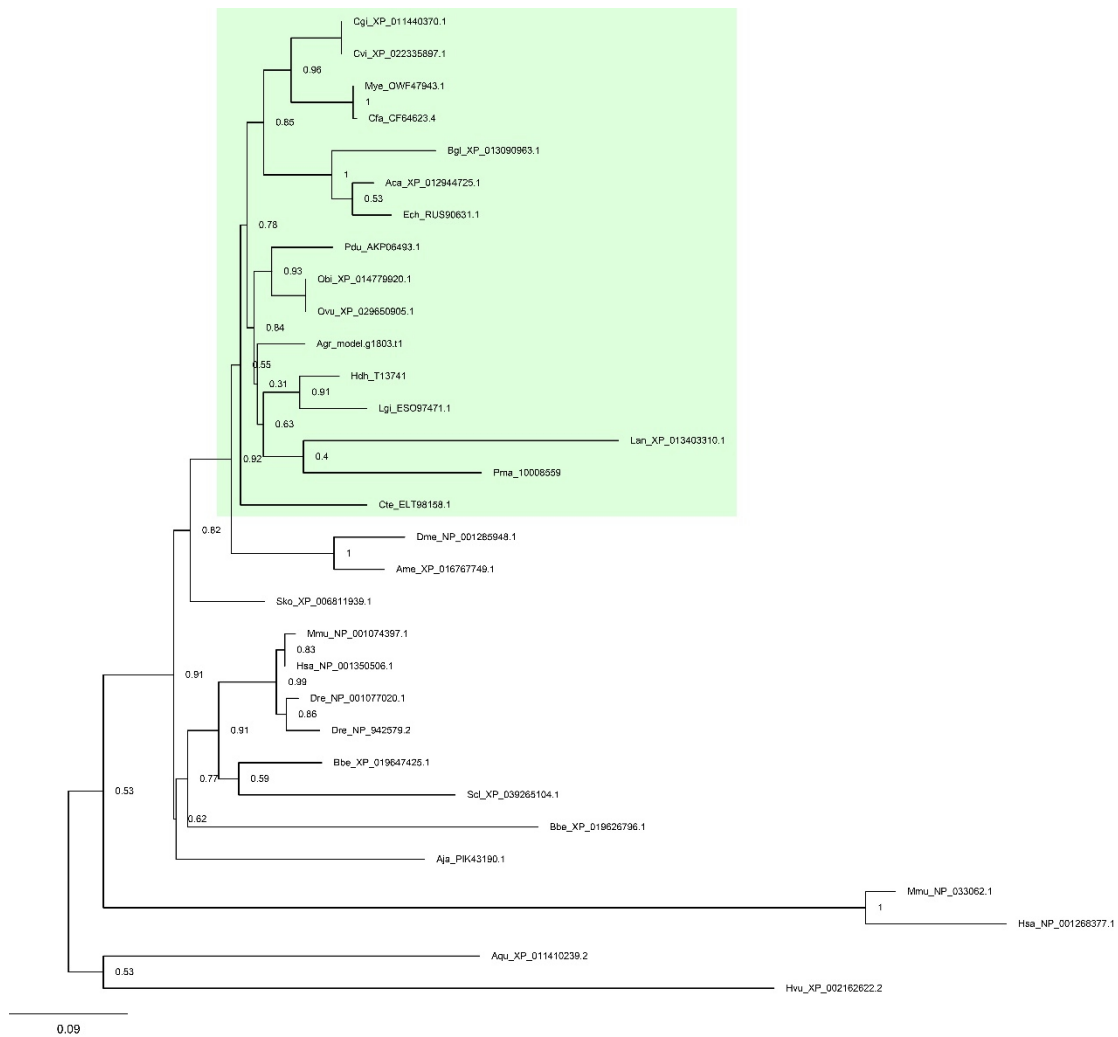

**Figure S4. Phylogeny of *Su(H)* genes across metazoans.** The phylogenetic tree was constructed using 31 *Su(H)* genes from 27 complete metazoan genomes using the maximum likelihood method. Fasttree support values are shown at the basal node. Lophotrochozoans are shown in green. The protein sequences of these genes are shown in Supplementary Data 6.

**Figure S5. Transcriptomic data of the Notch pathway genes (*Notch*, *Delta*, *Jagged*, *Presenilin*, and *Su(H)*) in eleven species throughout development.** The heatmaps show the expression trends. Red means high while white means low. Sequence IDs are shown in Supplementary Table S2 and S3. Developmental stage abbreviations are described in Supplementary Table S4. See “Figure S5.pdf” file.
